# Supplementary figures and images for: High thermoelectric figure of merit in nonplanar graphene nanoribbons with periodic divacancies
Source: Royal Society of Chemistry journal article supplement (doi:10.1039/d5cp02340h), 2025-12-10

(a)

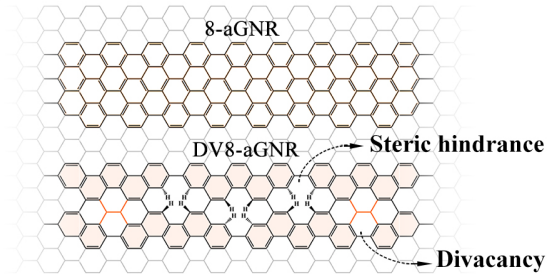

(b)

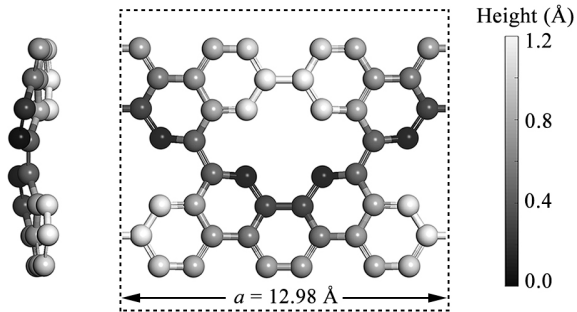

Supplement: d5cp02340h2.zip [file FigS1.pdf › SupplementaryInformation/FigS1.pdf]

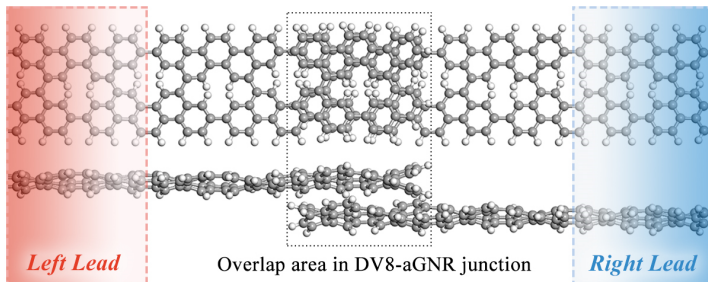

Length of overlap area  $L = 12.6 \text{ Å}$

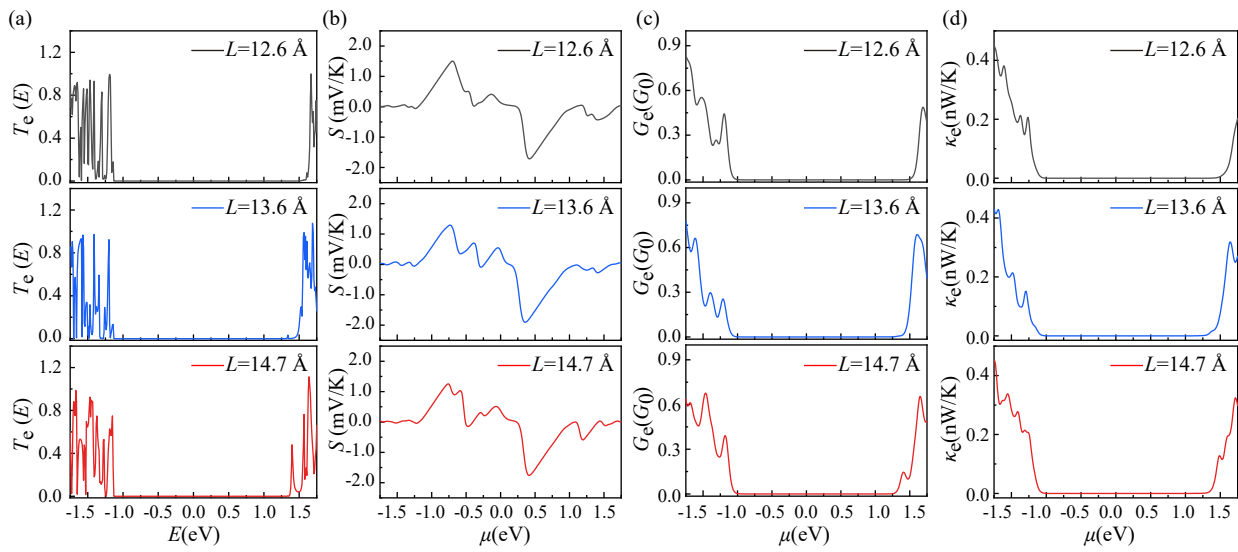

Supplement: d5cp02340h2.zip [file FigS10.pdf › SupplementaryInformation/FigS10.pdf]

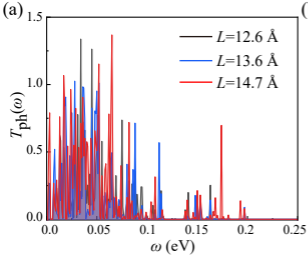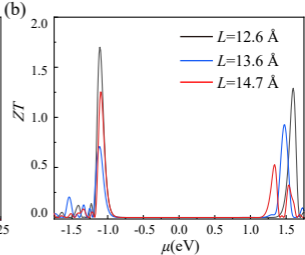

Supplement: d5cp02340h2.zip [file FigS11.pdf › SupplementaryInformation/FigS11.pdf]

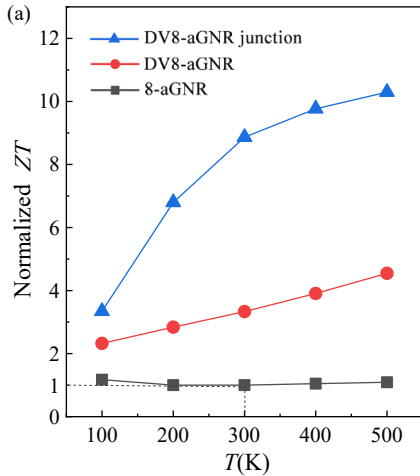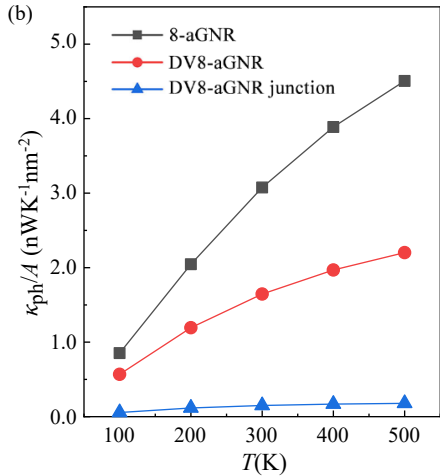

Supplement: d5cp02340h2.zip [file FigS12.pdf › SupplementaryInformation/FigS12.pdf]

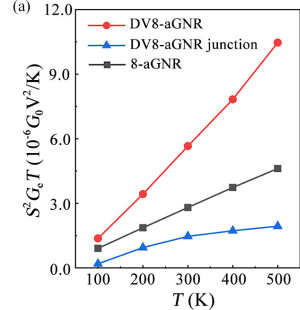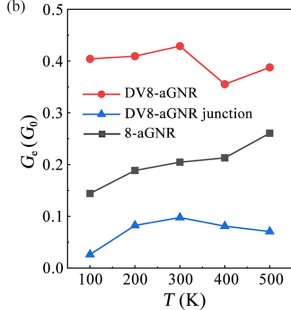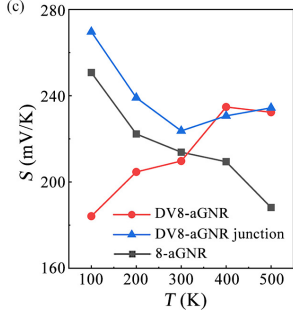

Supplement: d5cp02340h2.zip [file FigS13.pdf › SupplementaryInformation/FigS13.pdf]

DV8-aGNR

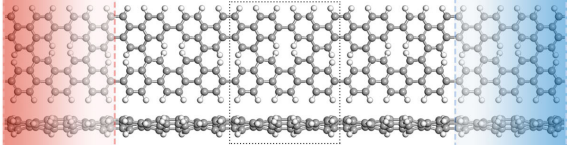

DV8-aGNR junction

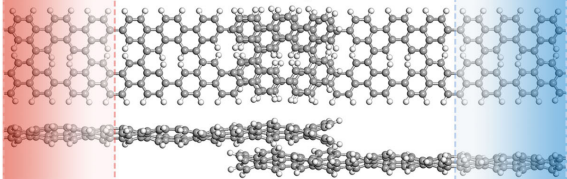

*Left Lead*

*Right Lead*

Supplement: d5cp02340h2.zip [file FigS2.pdf › SupplementaryInformation/FigS2.pdf]

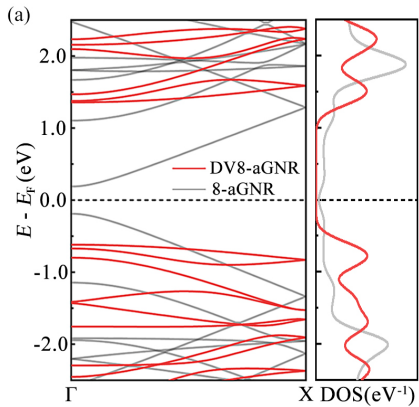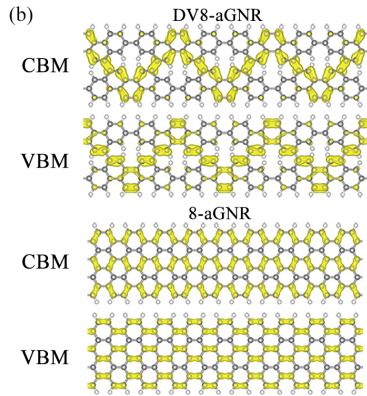

Supplement: d5cp02340h2.zip [file FigS3.pdf › SupplementaryInformation/FigS3.pdf]

**8-aGNR****DV8-aGNR** $\omega=0.023\text{eV}$ 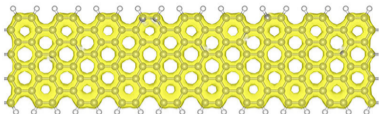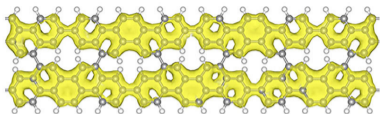 $\omega=0.041\text{eV}$ 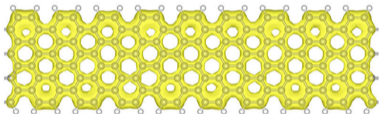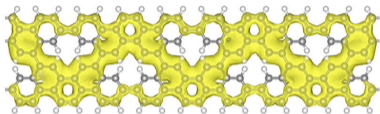 $\omega=0.064\text{eV}$ 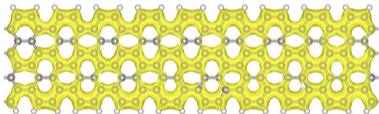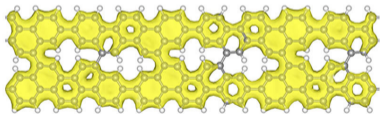 $\omega=0.084\text{eV}$ 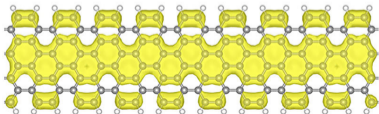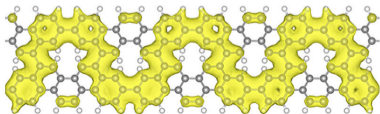

Supplement: d5cp02340h2.zip [file FigS4.pdf › SupplementaryInformation/FigS4.pdf]

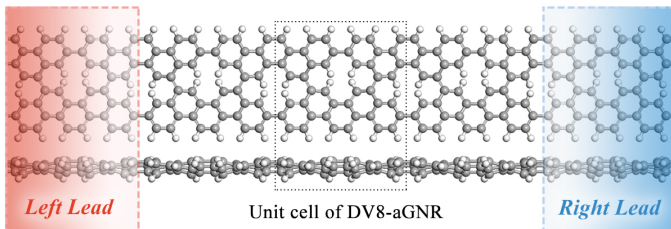

Number of unit cells in the scattering region  $N = 3$

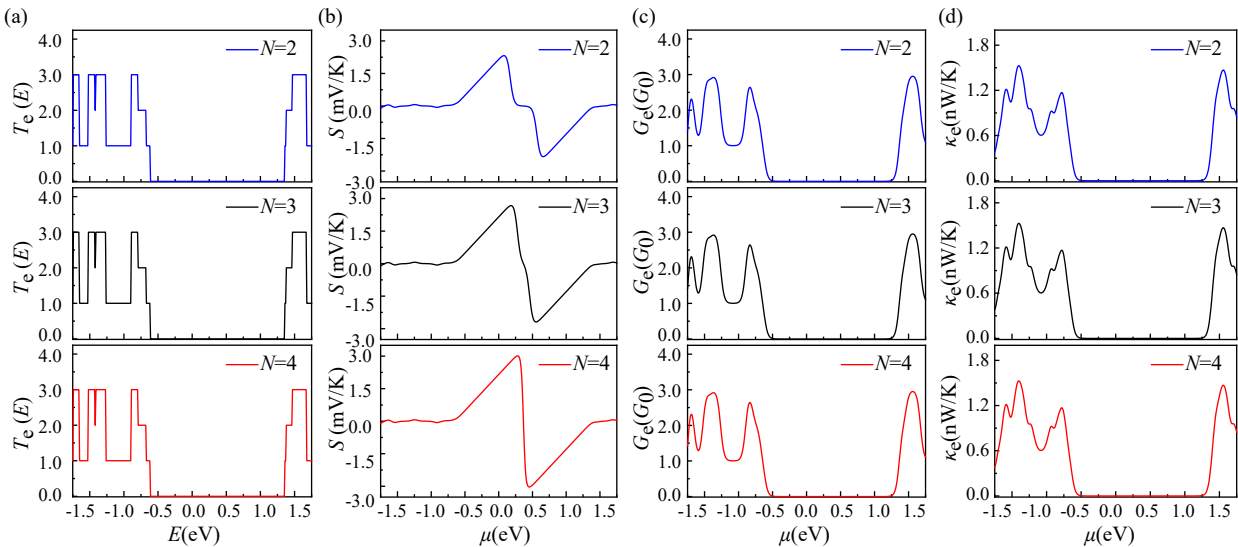

Supplement: d5cp02340h2.zip [file FigS5.pdf › SupplementaryInformation/FigS5.pdf]

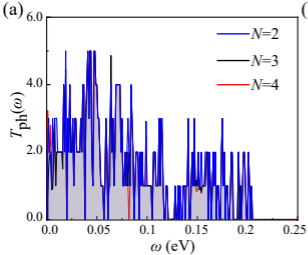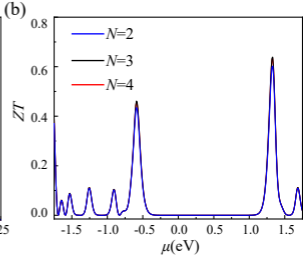

Supplement: d5cp02340h2.zip [file FigS6.pdf › SupplementaryInformation/FigS6.pdf]

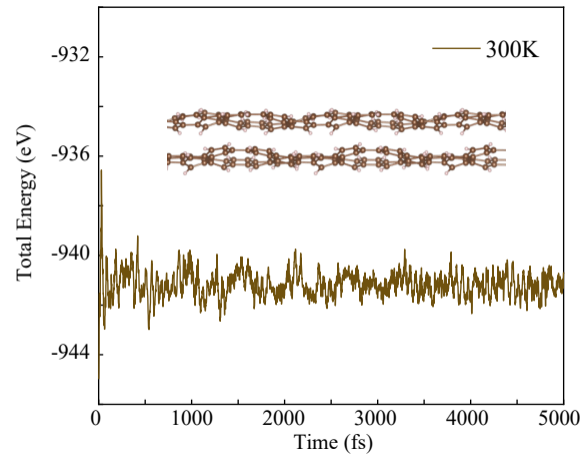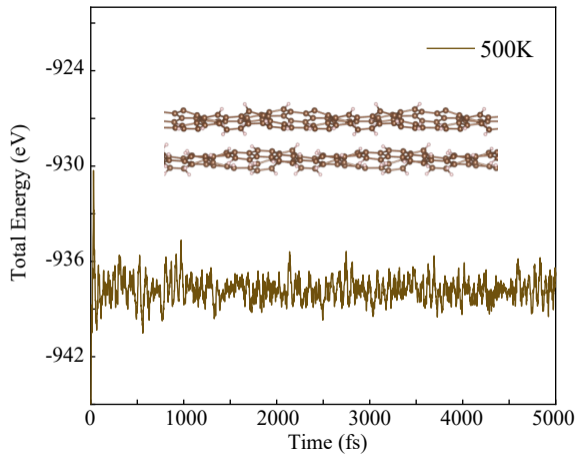

Supplement: d5cp02340h2.zip [file FigS7.pdf › SupplementaryInformation/FigS7.pdf]

$\omega = 0.031\text{eV}$

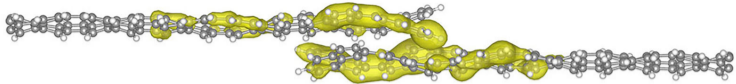

$\omega = 0.051\text{eV}$

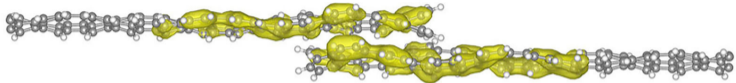

$\omega = 0.064\text{eV}$

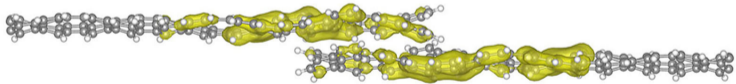

$\omega = 0.075\text{eV}$

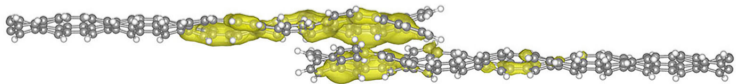

Supplement: d5cp02340h2.zip [file FigS8.pdf › SupplementaryInformation/FigS8.pdf]

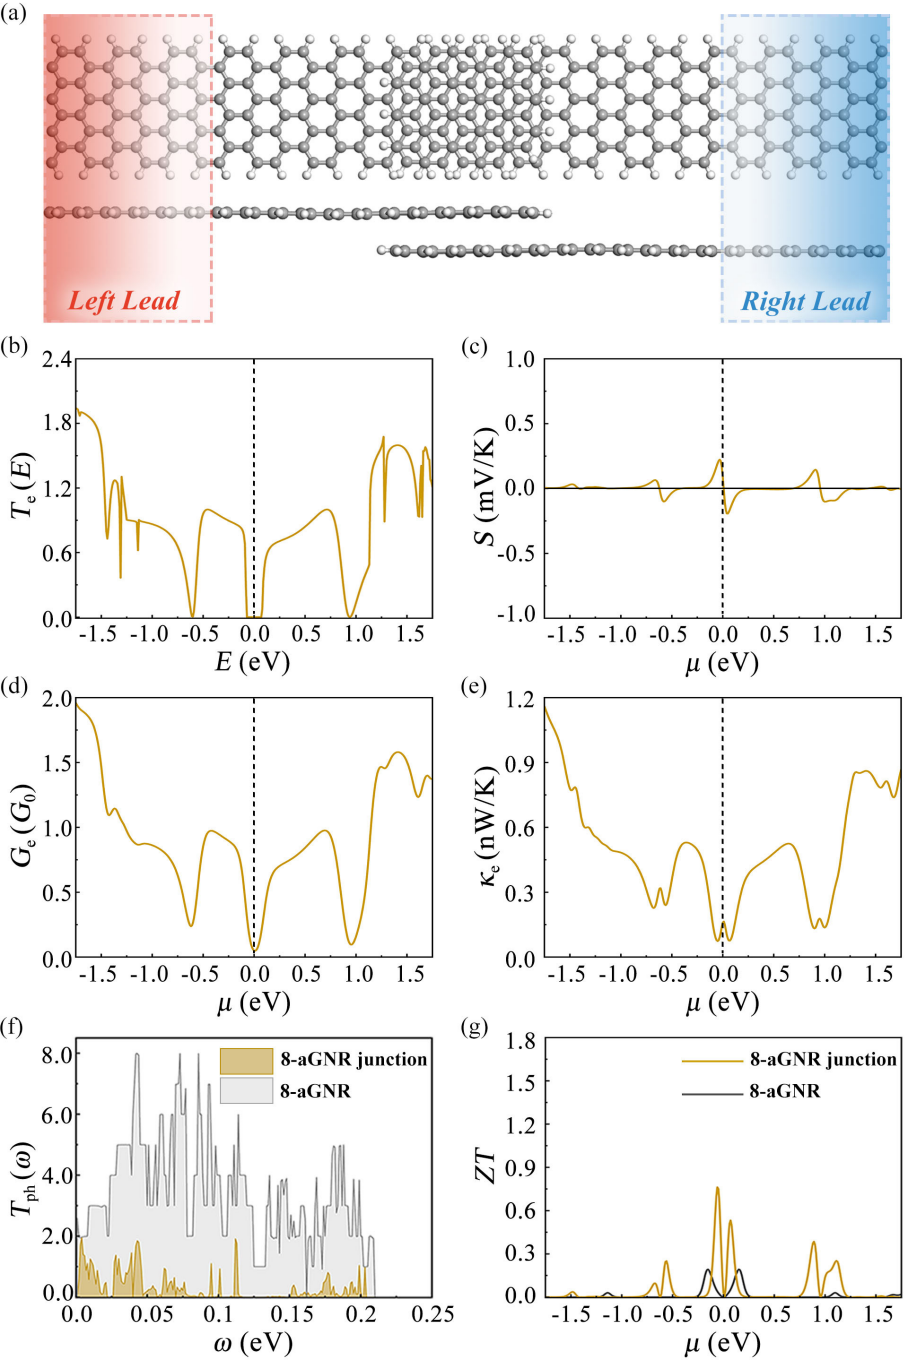

Supplement: d5cp02340h2.zip [file FigS9.pdf › SupplementaryInformation/FigS9.pdf]
